# Supplementary material for: Hierarchical Cu2S@NiCo-LDH double-shelled nanotube arrays with enhanced electrochemical performance for hybrid supercapacitors
Source: Royal Society of Chemistry journal article supplement (doi:10.1039/d0ta08006c), 2020-01-01
Supplement: d0ta08006c1.pdf [file d0ta08006c1.pdf]

# ESI:

## **Hierarchical Cu<sub>2</sub>S@NiCo-LDH double-shelled nanotube arrays with enhanced electrochemical performance for hybrid supercapacitors**

Ze Yuan,<sup>‡a</sup> Haiyan Wang,<sup>‡a</sup> Junling Shen,<sup>a</sup> Pengcheng Ye,<sup>a</sup> Jiqiang Ning,<sup>b</sup> Yijun Zhong,<sup>\*a</sup> and Yong Hu<sup>\*a</sup>

<sup>a</sup>Key Laboratory of the Ministry of Education for Advanced Catalysis Materials, Department of Chemistry, Zhejiang Normal University, Jinhua 321004, China. E-mail: yonghu@zjnu.edu.cn; yonghuzjnu@163.com; yjzhong@zjnu.edu.cn

<sup>b</sup>Vacuum Interconnected Nanotech Workstation, Suzhou Institute of Nano-Tech and Nano-Bionics, Chinese Academy of Sciences, Suzhou 215123, China.

<sup>‡</sup> These authors contributed equally to this work.

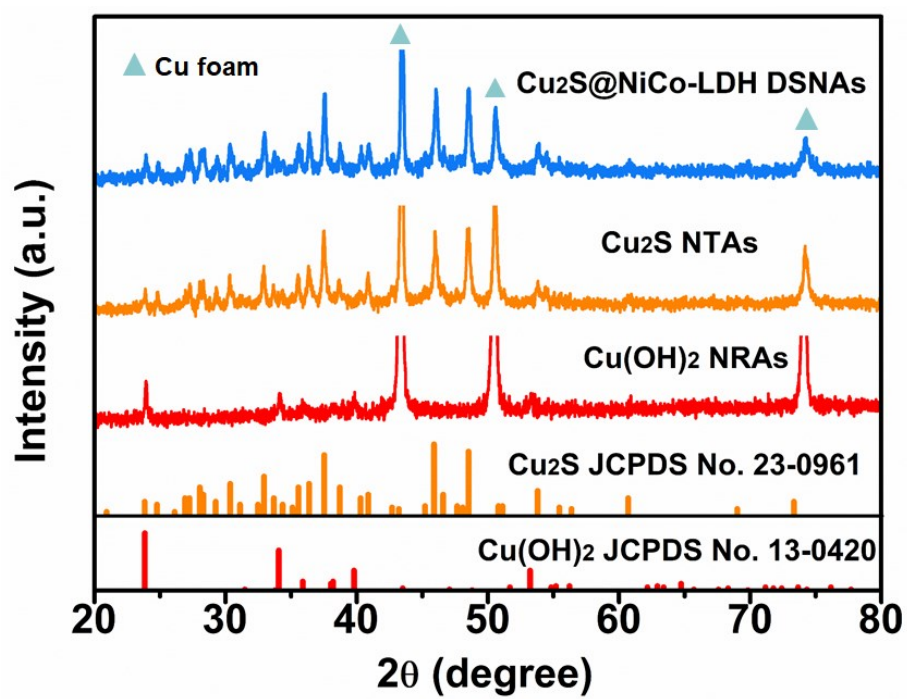

**Fig. S1** XRD patterns of the as-prepared Cu(OH)<sub>2</sub> NRAs, Cu<sub>2</sub>S NTAs and Cu<sub>2</sub>S@NiCo-LDH DSNAs.

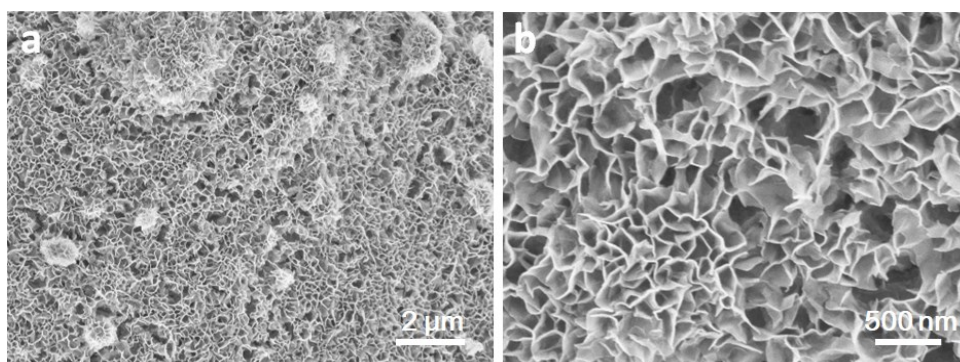

**Fig. S2** FE-SEM images of the as-prepared NiCo-LDH NSs.

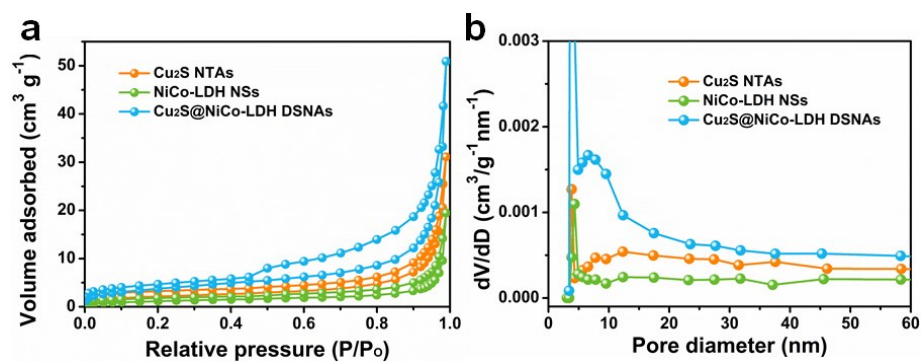

**Fig. S3** (a) N<sub>2</sub> adsorption-desorption isotherms, and (b) pore size distribution curves of the Cu<sub>2</sub>S@NiCo-LDH DSNA, NiCo-LDH NSs and Cu<sub>2</sub>S NTAs.

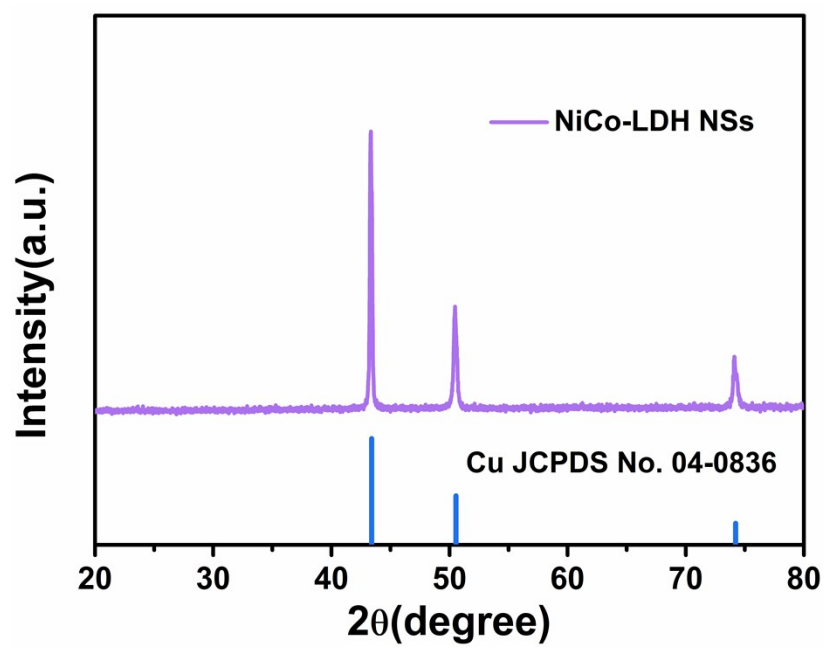

Fig. S4 XRD pattern of the as-prepared NiCo-LDH NSs.

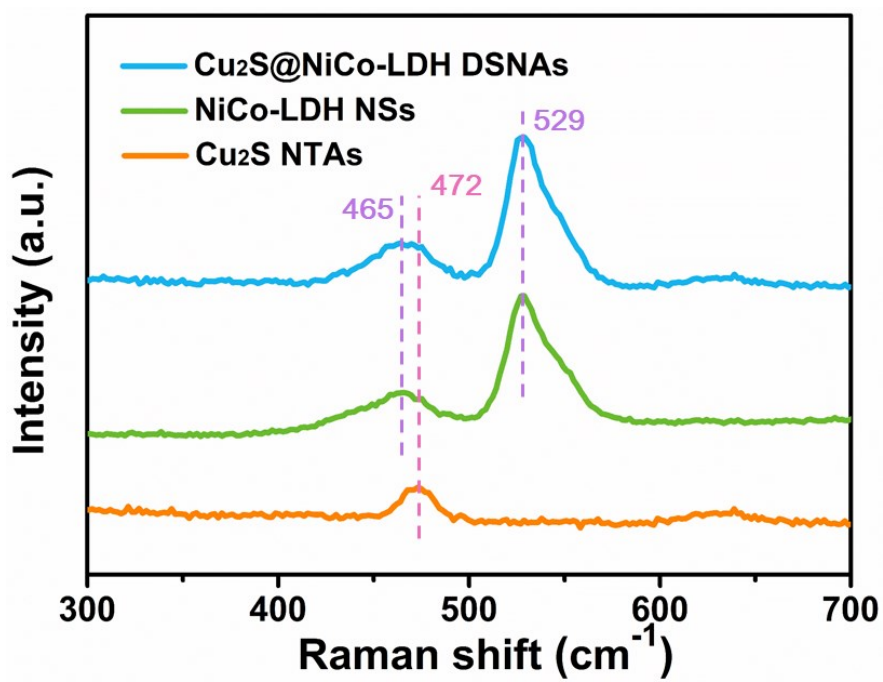

Fig. S5 Raman spectra of the Cu<sub>2</sub>S@NiCo-LDH DSNAs, NiCo-LDH NSs and Cu<sub>2</sub>S NTAs.

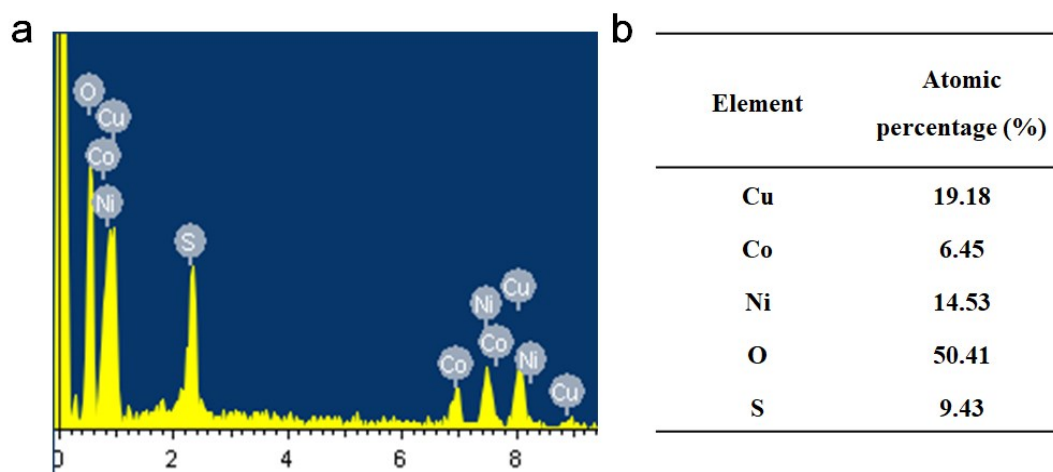

**Fig. S6** (a) EDX spectrum and (b) atomic percentage of the as-prepared  $\text{Cu}_2\text{S@NiCo-LDH}$  DSNA sample.

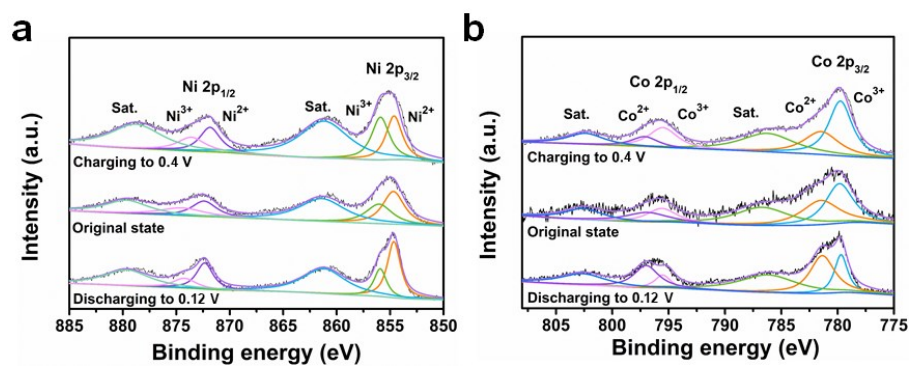

Fig. S7 The high-resolution XPS of (a) Ni 2p and (b) Co 2p of  $\text{Cu}_2\text{S}@$ NiCo-LDH DSNA at the original state and with charge/discharge states.



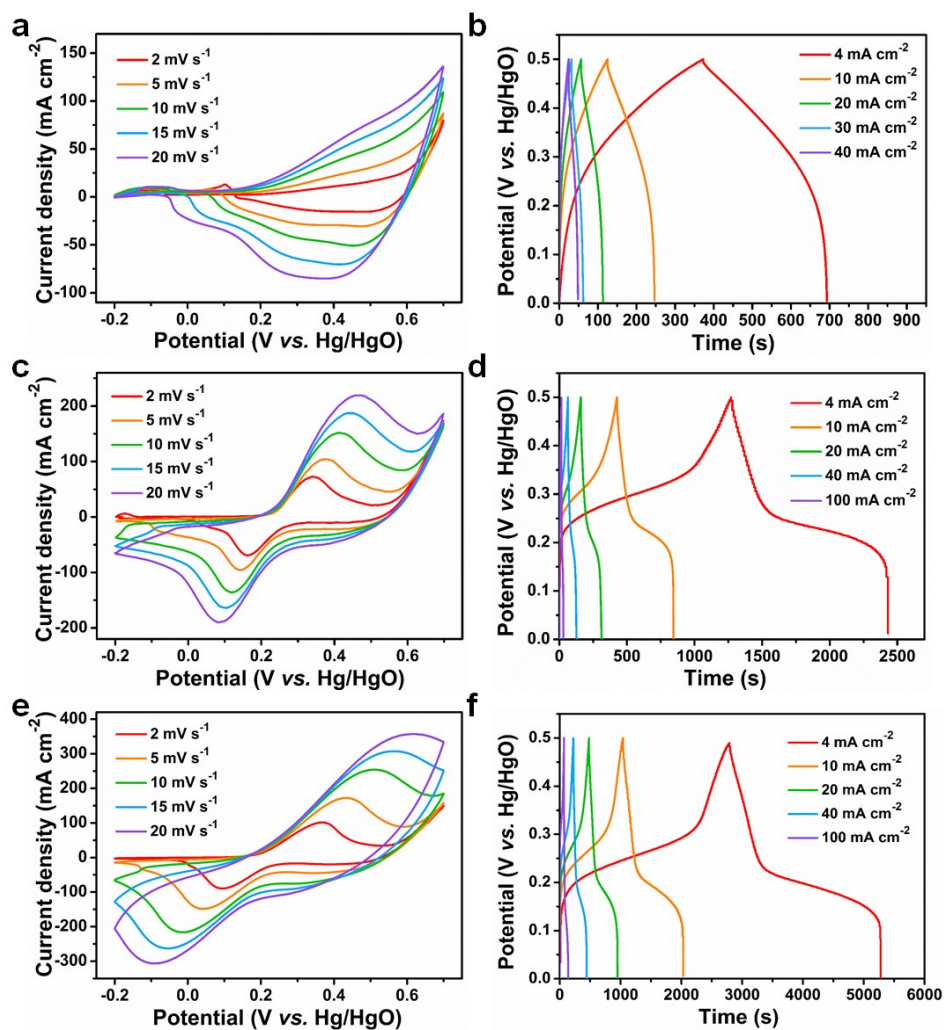

**Fig. S8** CV curves of the as-prepared (a) Cu<sub>2</sub>S NTAs, (c) NiCo-LDH NSs, (e) Cu<sub>2</sub>S@NiCo-LDH DSAs at various scan rates, GCD curves of (b) Cu<sub>2</sub>S NTAs, (d) NiCo-LDH NSs, (f) Cu<sub>2</sub>S@NiCo-LDH DSAs at various current densities.

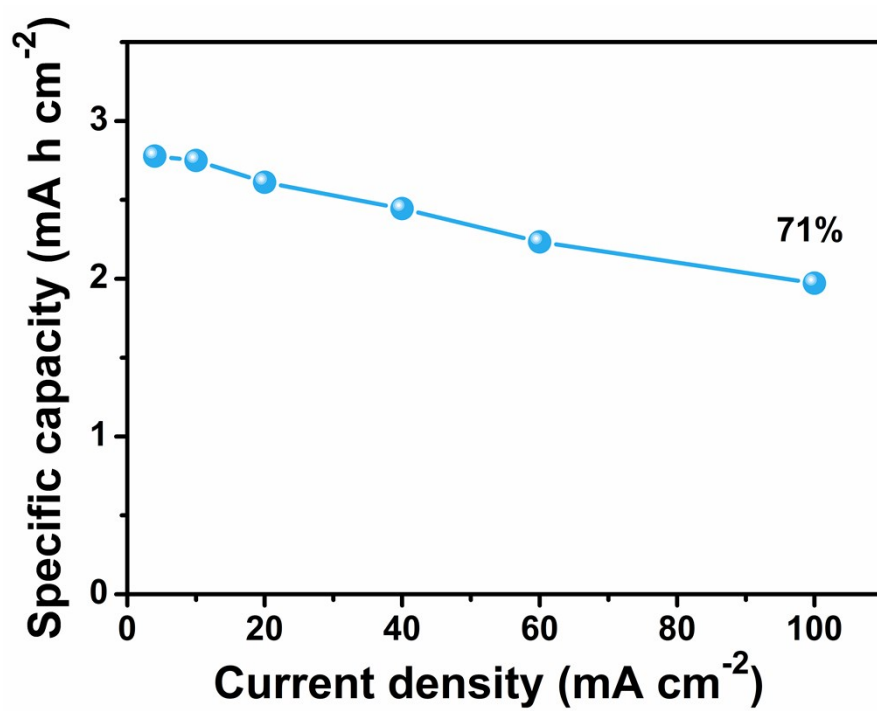

**Fig. S9** The specific capacities of the Cu<sub>2</sub>S@NiCo-LDH DSNAs at different current densities.

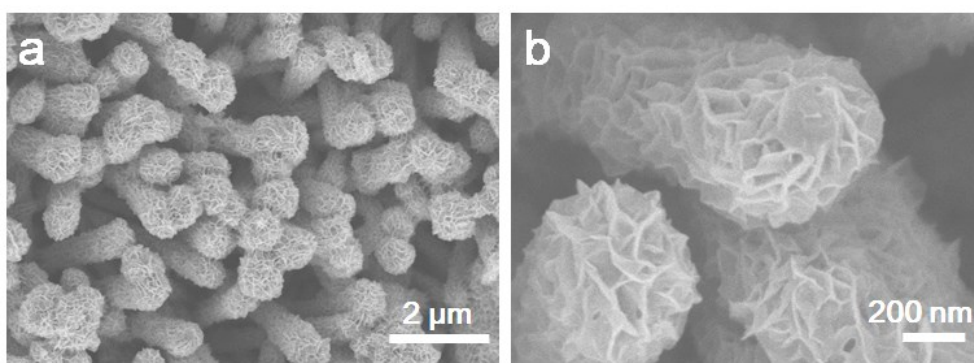

**Fig. S10** (a, b) FE-SEM images of the  $\text{Cu}_2\text{S}@\text{NiCo-LDH}$  DSNA after cyclic stability test.

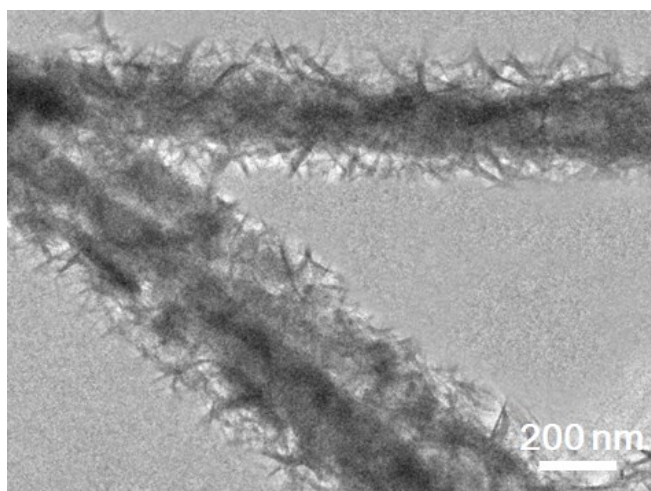

**Fig. S11** TEM image of the Cu<sub>2</sub>S@NiCo-LDH DSNA after cyclic stability test.

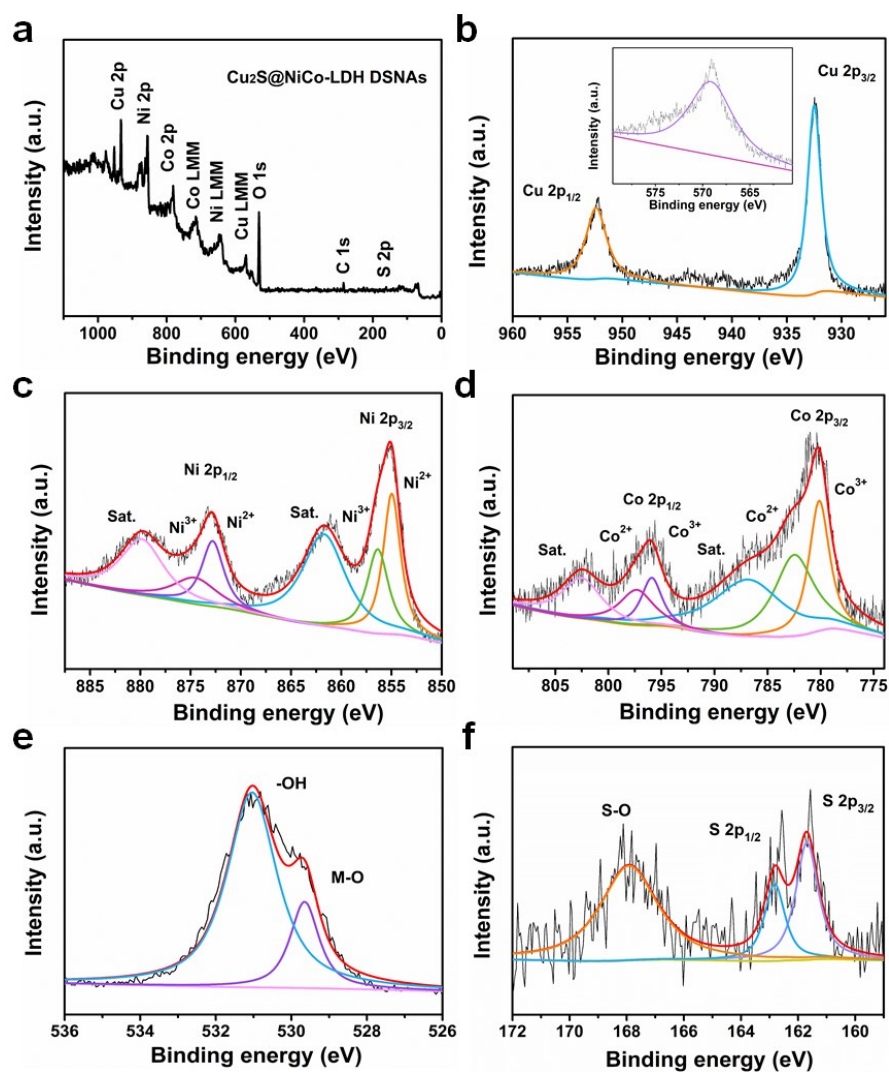

**Fig. S12** XPS spectra of the  $\text{Cu}_2\text{S}@NiCo\text{-LDH}$  DSNA after cyclic stability test. (a) Survey spectra and the high-resolution XPS of (b) Cu 2p (inset shows the Auger Cu LMM lines), (c) Ni 2p, (d) Co2p, (e) O 1s and (f) S 2p.

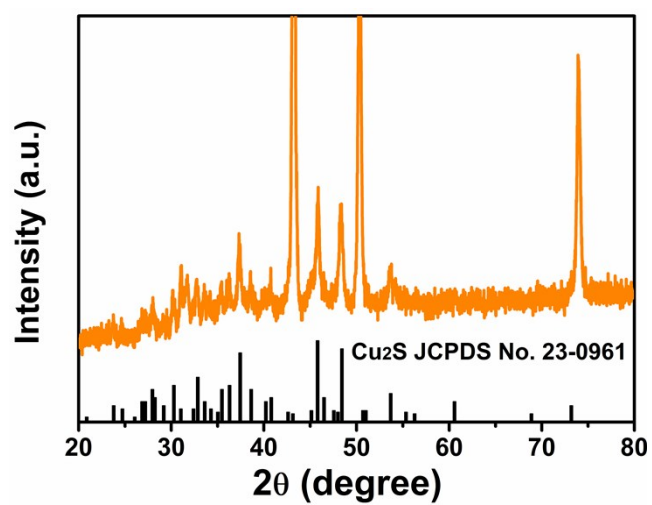

**Fig. S13** XRD pattern of the Cu<sub>2</sub>S@NiCo-LDH DSNAs after cyclic stability test.

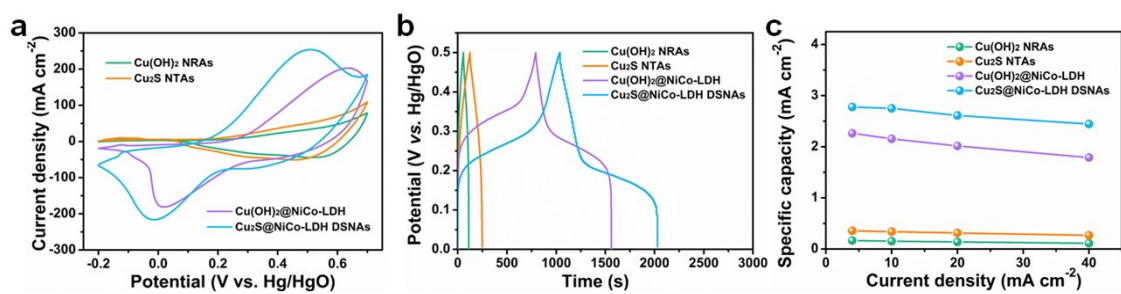

**Fig. S14** Electrochemical performances of the Cu(OH)<sub>2</sub> NRAs, Cu<sub>2</sub>S NTAs, Cu(OH)<sub>2</sub>@ NiCo-LDH and Cu<sub>2</sub>S@NiCo-LDH DSNA. (a) CV curves at 10 mV s<sup>-1</sup>. (b) GCD curves at 10 mA cm<sup>-2</sup>. (c) Specific capacities at different current densities.

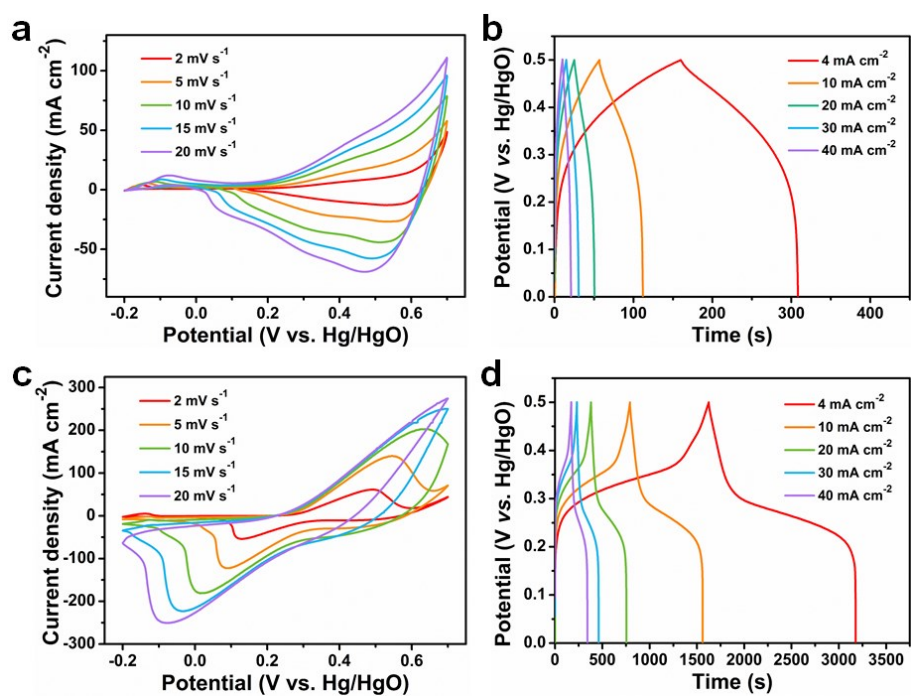

**Fig. S15** CV curves of the as-prepared (a) Cu(OH)<sub>2</sub> NRAs, (c) Cu(OH)<sub>2</sub>@NiCo-LDH, at various scan rates, GCD curves of (b) Cu<sub>2</sub>S NTAs, (d) Cu<sub>2</sub>S@NiCo-LDH DSNAs, at various current densities.



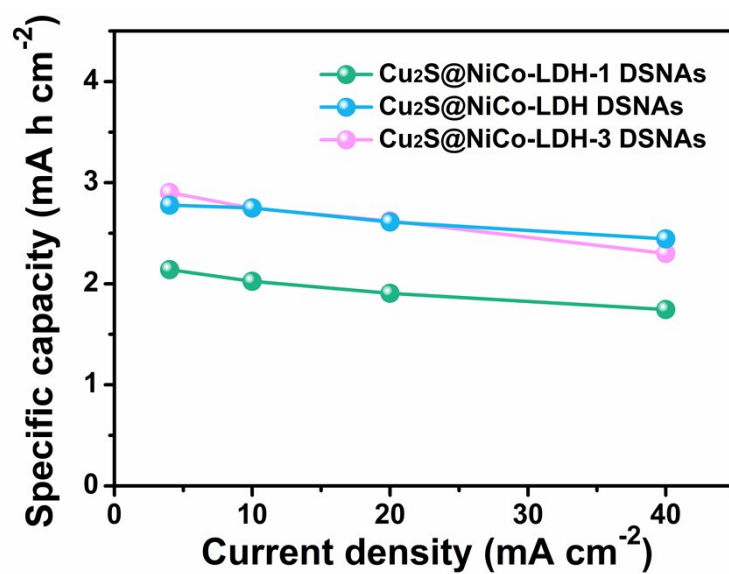

**Fig. S16** Specific capacitances of Cu<sub>2</sub>S@NiCo-LDH-1 DSNA, Cu<sub>2</sub>S@NiCo-LDH DSNA and Cu<sub>2</sub>S@NiCo-LDH-3 DSNA at different current densities.

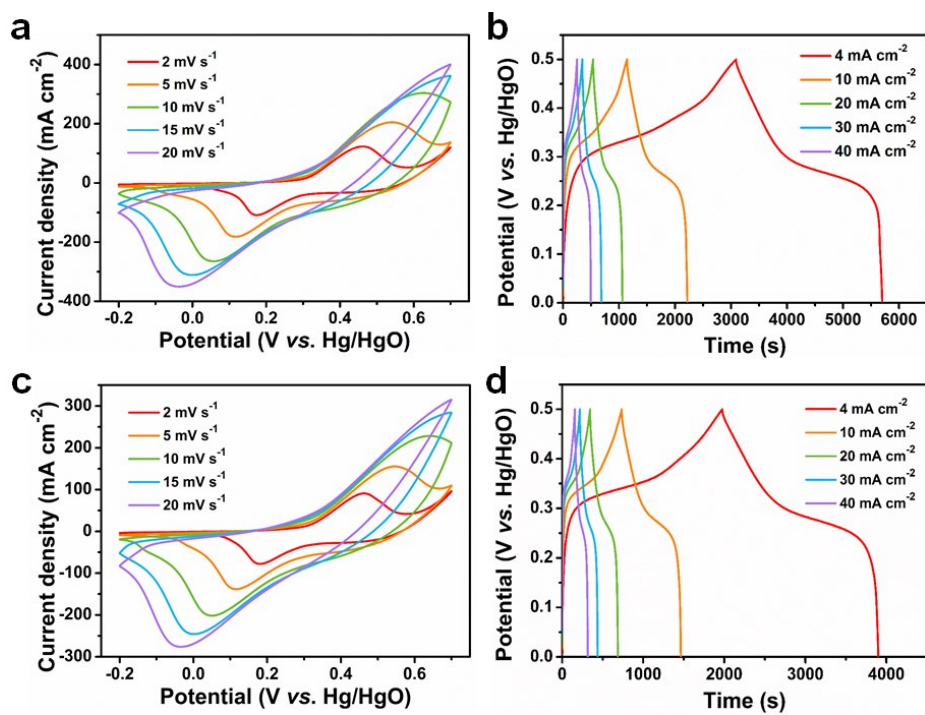

**Fig. S17** (a) CV curves and (b) GCD curves of the as-prepared Cu<sub>2</sub>S@NiCo-LDH-3 DSNAs, (c) CV curves and (d) GCD curves of the as-prepared Cu<sub>2</sub>S@NiCo-LDH-1 DSNAs.

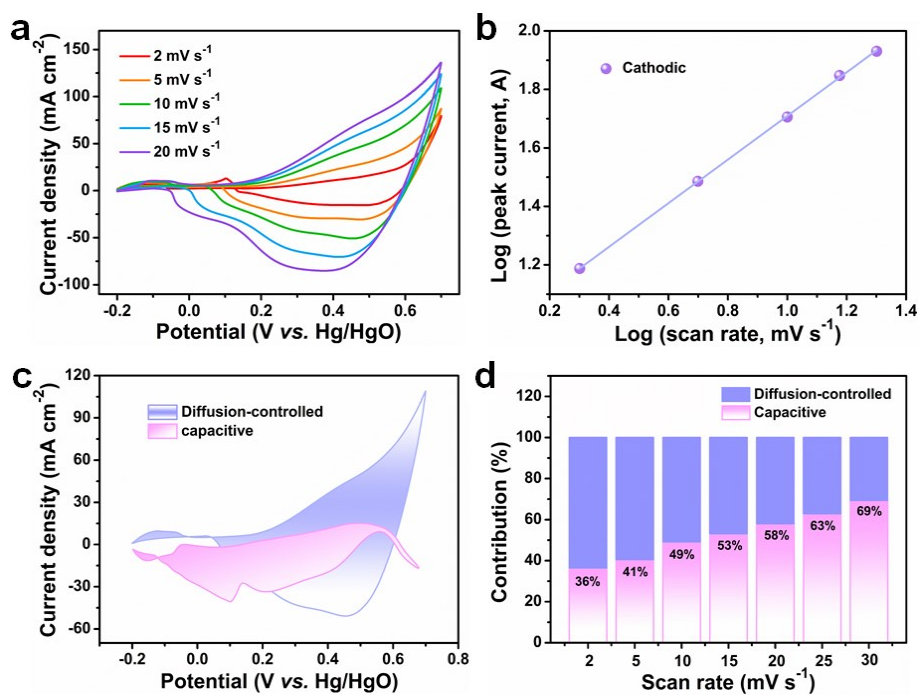

**Fig. S18** (a) The CV curves of the Cu<sub>2</sub>S NTAs electrode at different scan rates. (b) The plot of log(*i*) versus log(*v*). (c) Separation of the diffusion and capacitive-controlled currents of the Cu<sub>2</sub>S NTAs electrode at a scan rate of 10 mV s<sup>-1</sup>. (d) Relative contribution of the diffusion and capacitive-controlled charge storage at different scan rates.

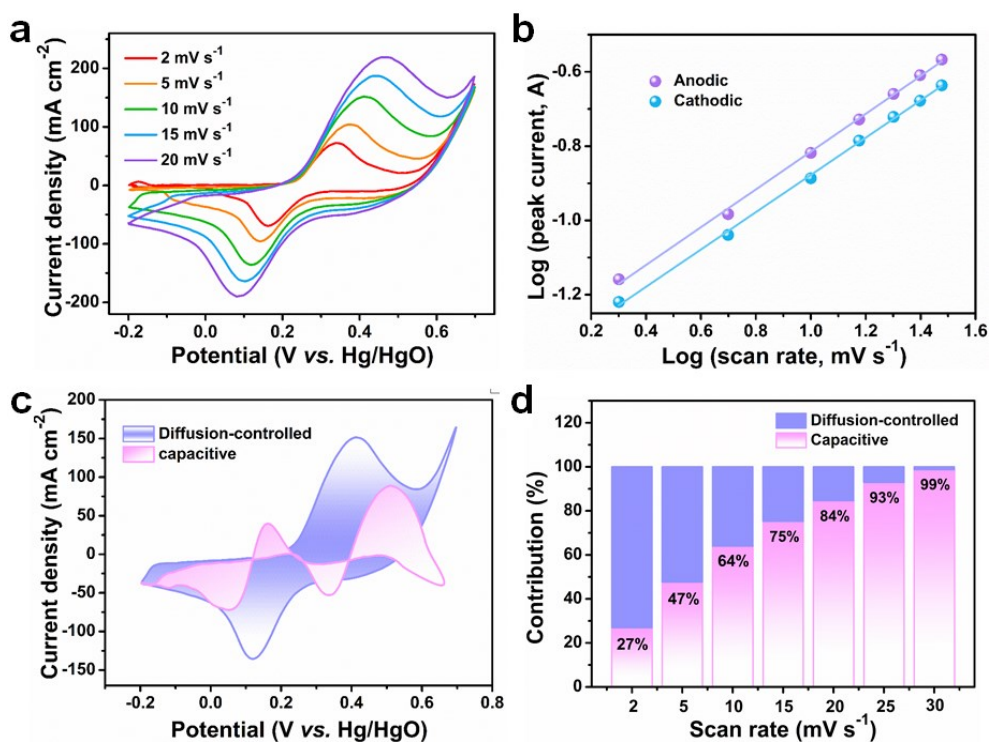

**Fig. S19** (a) The CV curves of the NiCo-LDH NSs electrode at different scan rates. (b) The plot of  $\log(i)$  versus  $\log(v)$ . (c) Separation of the diffusion and capacitive-controlled currents of the NiCo-LDH NSs electrode at a scan rate of 10 mV s<sup>-1</sup>. (d) Relative contribution of the diffusion and capacitive-controlled charge storage at different scan rates.

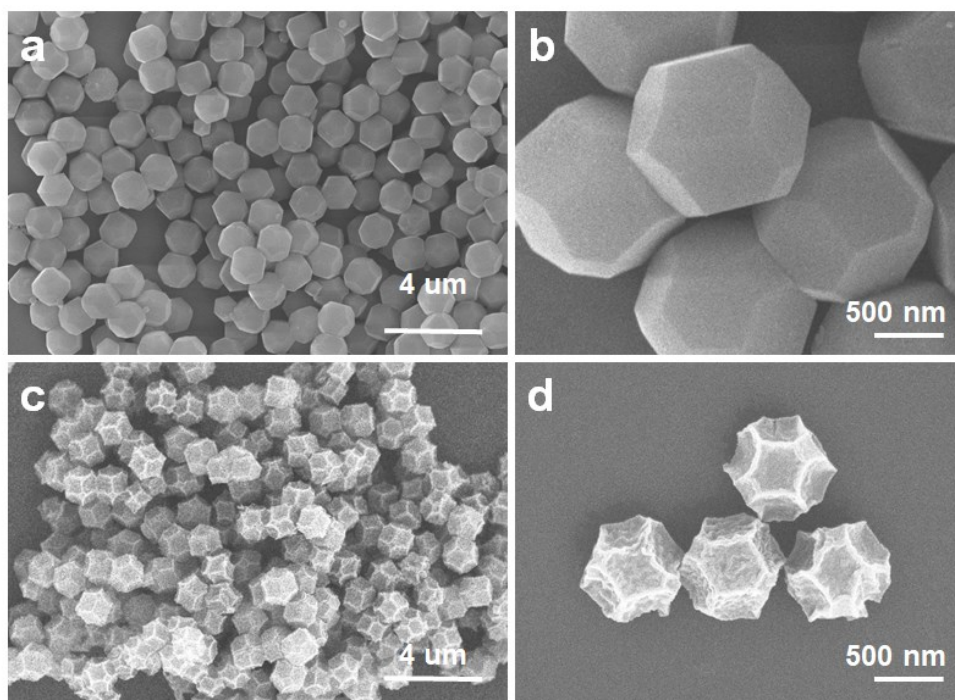

**Fig. S20** The FE-SEM images of the as-prepared (a, b) ZIF-8 and (c, d) NPC.

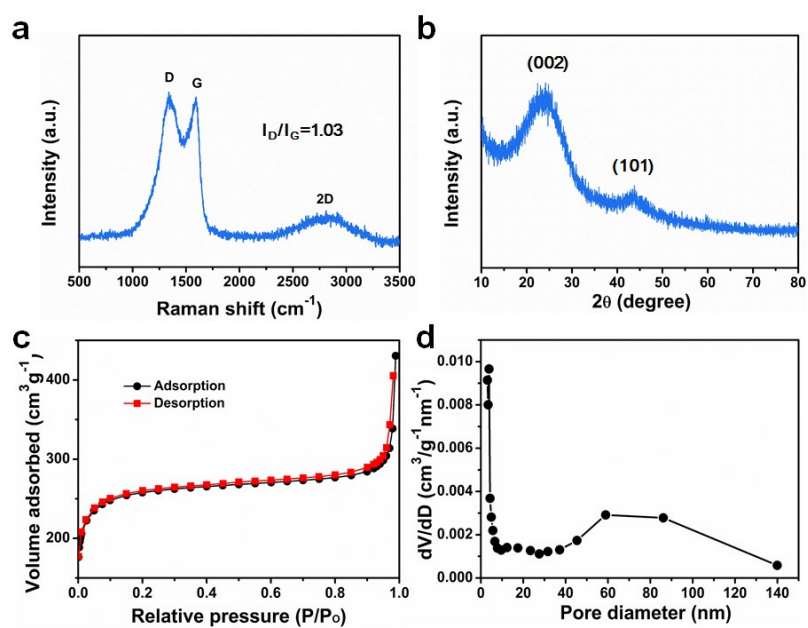

**Fig. S21** Structural characterization of the as-prepared NPC: (a) Raman; (b) XRD pattern; (c)  $\text{N}_2$  adsorption isotherms and (d) pore size distribution.

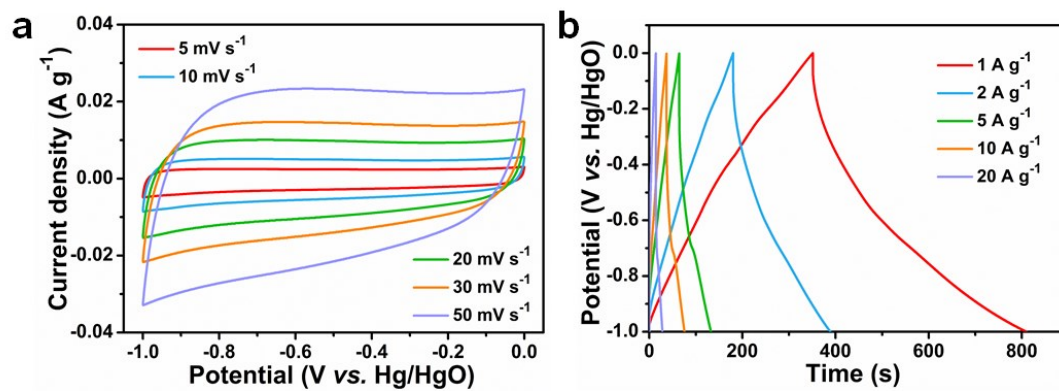

Fig. S22 (a) CV curves and (b) GCD curves of the as-prepared NPC.

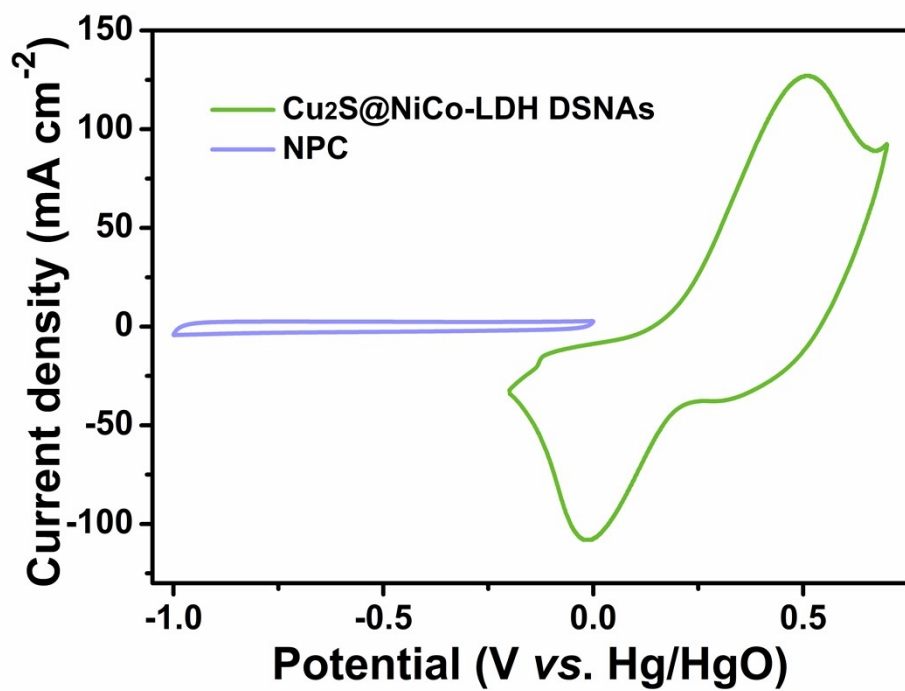

Fig. S23 CV curves of the Cu<sub>2</sub>S@NiCo-LDH DSNAs and NPC at 10 mV s<sup>-1</sup>.



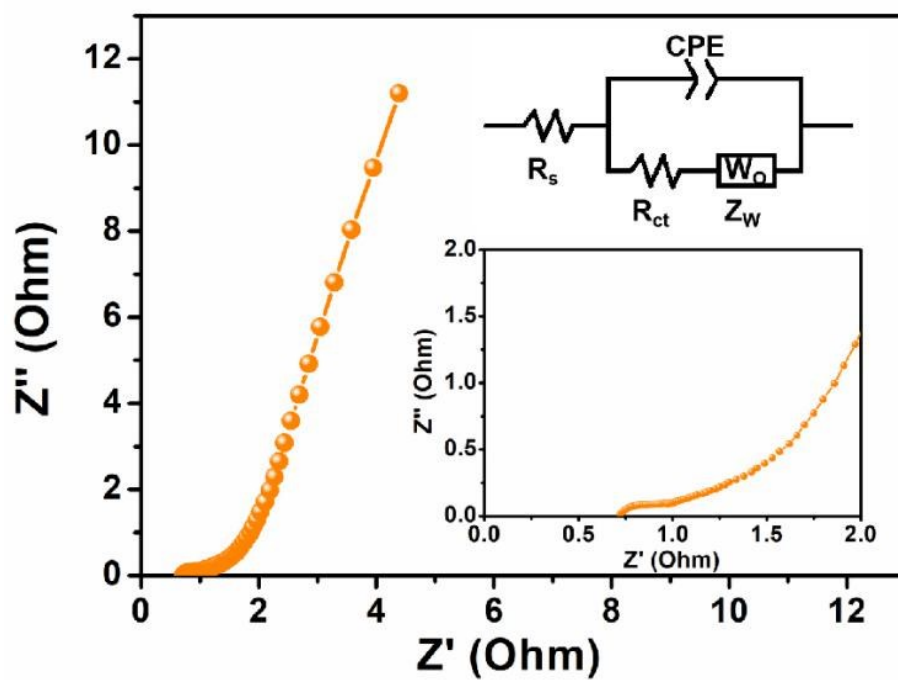

**Fig. S24** EIS spectrum of the  $\text{Cu}_2\text{S}@/\text{NiCo-LDH}$  DSNAs/NPC HSC device with the insets of the EIS spectrum in high-frequency region and the simulated circuit diagram, respectively.

**Table S1** Comparative areal capacity values (measured in three-electrode system) of the previously reported transition metal hydroxides-based electrodes with our Cu<sub>2</sub>S@NiCo-LDH DSNAs.

| Electrode material                                                                     | Electrolyte | Current density (mA cm <sup>-2</sup> ) | C <sub>a</sub> (F cm <sup>-2</sup> ) | Ref.      |
|----------------------------------------------------------------------------------------|-------------|----------------------------------------|--------------------------------------|-----------|
| Cu <sub>2</sub> S@NiCo-LDH DSNAs                                                       | 6 M KOH     | 4                                      | 20.40                                | This work |
| Cu <sub>3</sub> N@CoFe-LDH                                                             | 2 M KOH     | 1                                      | 3.08                                 | S1        |
| Co(OH) <sub>2</sub> /HNNF                                                              | 2 M KOH     | 5                                      | 3.17                                 | S2        |
| Zn-Ni-Co TOH                                                                           | 1 M KOH     | 3                                      | 2.14                                 | S3        |
| CuO@CoFe-LDH NWAs                                                                      | 1 M KOH     | 2.5                                    | 0.87                                 | S4        |
| NC LDH NFAs@NSs/Ni                                                                     | 1 M KOH     | 2                                      | 1.46                                 | S5        |
| ZnCo <sub>2</sub> O <sub>4</sub> @Ni <sub>x</sub> Co <sub>2-x</sub> (OH) <sub>6x</sub> | 2 M KOH     | 5                                      | 3.35                                 | S6        |
| CoNiO <sub>2</sub> NWAs@Ni(OH) <sub>2</sub> NSs/CNTF                                   | 3 M KOH     | 1                                      | 6.06                                 | S7        |

**Table S2** Fitting results of the EIS data

| Sample                           | $R_s$<br>( $\Omega$ ) | $R_{ct}$<br>( $\Omega$ ) | CPE-P<br>(mF) | CPE-T<br>(mF) | W-R<br>( $\Omega$ ) | W-T<br>( $\Omega$ ) | W-P<br>( $\Omega$ ) |
|----------------------------------|-----------------------|--------------------------|---------------|---------------|---------------------|---------------------|---------------------|
| Cu <sub>2</sub> S NTAs           | 0.80                  | 0.02                     | 0.66          | 1.05          | 0.60                | 0.80                | 0.49                |
| NiCo-LDH NSs                     | 0.64                  | 0.05                     | 0.67          | 0.31          | 1.96                | 2.79                | 0.38                |
| Cu <sub>2</sub> S@NiCo-LDH DSNAs | 0.61                  | 0.01                     | 1.18          | 0.01          | 0.48                | 1.30                | 0.40                |

**Table S3** Comparative areal capacitances, areal energy and power densities of recently reported HSCs with our HSCs.

| <b>Electrode material</b>                                                                             | <b>C<sub>a</sub></b><br><b>(F cm<sup>-2</sup>)</b> | <b>E<sub>a</sub></b><br><b>(mW h cm<sup>-2</sup>)</b> | <b>P<sub>a</sub></b><br><b>(mW cm<sup>-2</sup>)</b> | <b>Ref.</b>      |
|-------------------------------------------------------------------------------------------------------|----------------------------------------------------|-------------------------------------------------------|-----------------------------------------------------|------------------|
| <b>Cu<sub>2</sub>S@NiCo-LDH DSNAs</b>                                                                 | <b>4.2</b>                                         | <b>1.67</b>                                           | <b>4.25</b>                                         | <b>This work</b> |
| CoMoO <sub>4</sub> @Co(OH) <sub>2</sub> /CT//PAC                                                      | 0.5                                                | 0.17                                                  | 1.50                                                | S8               |
| NC LDH NSs@Ag@CC//AC                                                                                  | 0.2                                                | 0.08                                                  | 0.80                                                | S9               |
| NiCo <sub>2</sub> O <sub>4</sub> @Co <sub>0.33</sub> Ni <sub>0.67</sub> (OH) <sub>2</sub> //CMK-3-ASC | 0.9                                                | 0.32                                                  | 4.00                                                | S10              |
| ZnCO@Ni(OH) <sub>2</sub> /VN@C                                                                        | 0.6                                                | 0.20                                                  | 2.40                                                | S11              |
| NC LDH NFAs@NSs/Ni//AC@CF                                                                             | 1.2                                                | 0.40                                                  | 2.40                                                | S5               |
| Ni(OH) <sub>2</sub> -Cu//RGO                                                                          | 2.5                                                | 0.95                                                  | 2.01                                                | S12              |
| NiCo <sub>2</sub> S <sub>4</sub> //C                                                                  | 0.5                                                | 0.12                                                  | 0.80                                                | S13              |
| Cu <sub>3</sub> N@CoFe-LDH//AC                                                                        | 1.2                                                | 0.42                                                  | 1.70                                                | S1               |

## Reference

1. X. Zhou, X. Li, D. Chen, D. Zhao and X. Huang, *J. Mater. Chem. A*, 2018, **6**, 24603-24613.
2. Z. Yu, Z. Cheng, X. Wang, S. X. Dou and X. Kong, *J. Mater. Chem. A*, 2017, **5**, 7968-7978.
3. Z. Huang, F. Sun, M. Batmunkh, W. Li, H. Li, Y. Sun, Q. Zhao, X. Liu and T. Ma, *J. Mater. Chem. A*, 2019, **7**, 11826-11835.
4. Z. Li, M. Shao, L. Zhou, R. Zhang, C. Zhang, J. Han, M. Wei, D. Evans and X. Duan, *Nano Energy*, 2016, **20**, 294-304.
5. G. Nagaraju, S. Sekhar, L. Bharat and J. Yu, *ACS Nano*, 2017, **11**, 10860-10874.
6. W. Fu, Y. Wang, W. Han, Z. Zhang, H. Zha and E. Xie, *J. Mater. Chem. A*, 2016, **4**, 173-182.
7. Q. Li, Q. Zhang, J. Sun, C. Liu, J. Guo, B. He, Z. Zhou, P. Man, C. Li, L. Xie and Y. Yao, *Adv. Sci.*, 2019, **6**, 1801379.
8. G. Veerasubramani, A. Chandrasekhar, S. M. S. P, Y. Mok and S. Kim, *J. Mater. Chem. A*, 2017, **5**, 11100-11113.
9. S. Sekhar, G. Nagaraju and J. Yu, *Nano Energy*, 2017, **36**, 58-67.
10. K. Xu, R. Zou, W. Li, Q. Liu, X. Liu, L. An and J. Hu, *J. Mater. Chem. A*, 2014, **2**, 10090-10097.
11. Q. Zhang, W. Xu, J. Sun, Z. Pan, J. Zhao, X. Wang, J. Zhang, P. Man, J. Guo, Z. Zhou, B. He, Z. Zhang, Q. Li, Y. Zhang, L. Xu and Y. Yao, *Nano Lett.*, 2017, **17**, 7552-7560.
12. D. Shi, L. Zhang, X. Yin, T. J. Huang and H. Gong, *J. Mater. Chem. A*, 2016, **4**, 12144-12151.
13. W. Kong, C. Lu, W. Zhang, J. Pu and Z. Wang, *J. Mater. Chem. A*, 2015, **3**, 12452-12460.
